# Supplementary material for: Mycobacterial Caseinolytic Protease Gene Regulator ClgR Is a Substrate of Caseinolytic Protease
Source: PubMed Central journal article supplement (PMC5352834; doi:10.1128/msphere.00338-16), 2017-03-15
Supplement: sph002172251st1.pdf [file sph002172251st1.pdf]

Table S1. RFP promoter reporter plasmids and primers used in this study.

| Plasmid name             | Backbone plasmid (Digested with) | Inserted Promoter (PCR-amplified DNA fragments digested with NotI and BamHI/BsaI) |           |                             |                                     | Inserted Reporter (PCR product digested with BamH and EcoRI) |                               |
|--------------------------|----------------------------------|-----------------------------------------------------------------------------------|-----------|-----------------------------|-------------------------------------|--------------------------------------------------------------|-------------------------------|
|                          |                                  | Gene                                                                              | Size (bp) | Primer Name                 | Primer Sequence                     | Primer Name                                                  | Primer Sequence               |
| 1 P- <i>acr2</i> -RFP    | pMV306 (NotI---EcoRI)            | BCG_0289c                                                                         | 213       | P- <i>acr2</i> -F(NotI)     | gcggccgcGGTCTGAGGGTATGAGGGGCAAA     | mCh-F(BamHI)                                                 | ccgggatccATGGTGAGCAAGGGCGAGG  |
|                          |                                  |                                                                                   |           | P- <i>acr2</i> -R(BamHI)    | ccgggatccGGTTATCTCCTCATGCTTCGTTGT   | mCh-R(EcoRI)                                                 | ccggaattcCTACTTGACAGCTCGTCCAT |
| 2 P- <i>clgR</i> -RFP    | pMV306 (NotI---EcoRI)            | BCG_2761c                                                                         | 250       | P- <i>clgR</i> -F(NotI)     | gcggccgcCTGAAGACCTTTGTCCAGGC        | mCh-F(BamHI)                                                 | ccgggatccATGGTGAGCAAGGGCGAGG  |
|                          |                                  |                                                                                   |           | P- <i>clgR</i> -R(BsaI)     | cgggtctcgggatccCAAAAACCTCTTGCCACCTC | mCh-R(EcoRI)                                                 | ccggaattcCTACTTGACAGCTCGTCCAT |
| 3 P- <i>clpP1P2</i> -RFP | pMV306 (NotI---EcoRI)            | BCG_2481c                                                                         | 246       | P- <i>clpP1P2</i> -F(NotI)  | gcggccgcCGACAGTGACGGAACACGATCG      | mCh-F(BamHI)                                                 | ccgggatccATGGTGAGCAAGGGCGAGG  |
|                          |                                  |                                                                                   |           | P- <i>clpP1P2</i> -R(BamHI) | ccgggatccAGTGGGGCACCTGCTTTCCTCG     | mCh-R(EcoRI)                                                 | ccggaattcCTACTTGACAGCTCGTCCAT |
