# Supplementary material for: Mycobacterial Caseinolytic Protease Gene Regulator ClgR Is a Substrate of Caseinolytic Protease
Source: PubMed Central journal article supplement (PMC5352834; doi:10.1128/msphere.00338-16), 2017-03-15
Supplement: sph002172251st2.pdf [file sph002172251st2.pdf]

Table S2. Primers used for qRT-PCR.

| Target         | Primer | Primer sequences       | Amplicon (bp) | Reference                     |
|----------------|--------|------------------------|---------------|-------------------------------|
| <i>16S</i>     | Fwd    | ATGACGGCCTTCGGGTTGTAA  | 160           | Datta 2015 (modified for BCG) |
|                | Rev    | CGGCTGCTGGCACGTAGTTG   |               |                               |
| <i>acr2</i>    | Fwd    | ACCGCTGGCTACGTGACTTCTT | 139           | Datta 2015                    |
|                | Rev    | TCAATGCCGGGCAGTTCCAAA  |               |                               |
| <i>clgR</i>    | Fwd    | CCTCGGGTATCTGTCGGAGAT  | 84            | McGillivray 2014              |
|                | Rev    | AGCTGCAGAGCCGTACAAATC  |               |                               |
| <i>clpP1P2</i> | Fwd    | CGCCGTGATCAAGAAAGAAATG | 126           | McGillivray 2014              |
|                | Rev    | AAACCGTATTCCAGGGCTTC   |               |                               |

**Datta P, Ravi J, Guerrini V, Chauhan R, Neiditch MB, Shell SS, Fortune SM, Hancioglu B, Igoshin OA, Gennaro ML.** 2015. The Psp system of Mycobacterium tuberculosis integrates envelope stress-sensing and envelope-preserving functions. *Mol Microbiol* 97:408-422.

**McGillivray A, Golden NA, Gautam US, Mehra S, Kaushal D.** 2014. The Mycobacterium tuberculosis Rv2745c plays an important role in responding to redox stress. *PLoS One* 9:e93604.
