# Supplementary material for: Mycobacterial Caseinolytic Protease Gene Regulator ClgR Is a Substrate of Caseinolytic Protease
Source: PubMed Central journal article supplement (PMC5352834; doi:10.1128/msphere.00338-16), 2017-03-15
Supplement: sph002172251st3.pdf [file sph002172251st3.pdf]

Table S3. RFP protein fusion plasmids and primers used in this study.

| Plasmid name         | Backbone plasmid (with)    | (Digested with) | Inserted Reporters/gene fragments (PCR-amplified DNA fragments) |                                                              |                       |                                  |
|----------------------|----------------------------|-----------------|-----------------------------------------------------------------|--------------------------------------------------------------|-----------------------|----------------------------------|
|                      |                            |                 | Primer Name                                                     | Primer Sequence                                              | Primer Name           | Primer Sequence                  |
| 1 RFP-ClgR           | pMV262 (BamHI---HindIII)   |                 | mCh-F(BamHI)                                                    | ccgggatccATGGTGAGCAAGGGCGAGG                                 | clgR-F(EcoRI)         | ccggaattcATGGCGGCTTTGGTGCGTGA    |
|                      |                            |                 | mCh-Link-R(EcoRI)                                               | ccggaattcACCAGAACCACCTTGTACAGCTCGTCCATACC                    | clgR-R(HindIII)       | ccgaagcttTTAGGCCACCGCCAGCGAC     |
| 2 ClgR-RFP           | pMV262 (BamHI---HindIII)   |                 | ClgR-F(BamHI)                                                   | ccgggatccATGGCGGCTTTGGTGCGTGA                                | mCh-F(EcoRI)          | ccggaattcATGGTGAGCAAGGGCGAGG     |
|                      |                            |                 | ClgR-Link-R(EcoRI)                                              | ccggaattcACCAGAACCACCGGCCACCGCCAGCGACAC                      | mCh-R(HindIII)        | ccgaagcttCTACTTGTACAGCTCGTCCAT   |
| 3 eGFP-ClgR          | pMV262 (BamHI---HindIII)   |                 | mCh-F(BamHI)                                                    | ccgggatccATGGTGAGCAAGGGCGAGG                                 | clgR-F(EcoRI)         | ccggaattcATGGCGGCTTTGGTGCGTGA    |
|                      |                            |                 | eGFP-Link-R(EcoRI)                                              | ccggaattcACCAGAACCACCTTGTACAGCTCGTCCATGC                     | clgR-R(HindIII)       | ccgaagcttTTAGGCCACCGCCAGCGAC     |
| 4 CgR-eGFP           | pMV262 (BamHI---HindIII)   |                 | clgR-F(BamHI)                                                   | ccgggatccATGGCGGCTTTGGTGCGTGA                                | eGFP-F(EcoRI)         | ccggaattcATGGTGAGCAAGGGCGAGGAGC  |
|                      |                            |                 | clgR-Link-R(EcoRI)                                              | ccggaattcACCAGAACCACCGGCCACCGCCAGCGACAC                      | eGFP-R(HindIII)       | ccgaagcttCTACTTGTACAGCTCGTCCATGC |
| 5 RFP-ClgR(CΔ29)     | pMV262 (BamHI---HindIII)   |                 | mCh-F(BamHI)                                                    | ccgggatccATGGTGAGCAAGGGCGAGG                                 | clgR-F(EcoRI)         | ccggaattcATGGCGGCTTTGGTGCGTGA    |
|                      |                            |                 | mCh-Link-R(EcoRI)                                               | ccggaattcACCAGAACCACCTTGTACAGCTCGTCCATACC                    | clgR(CΔ29)-R(HindIII) | ccgaagcttTTAGCGGGCAAGGCGCTCTTGA  |
| 6 RFP                | pMV262 (BamHI---EcoRI)     |                 | mCh-F(BamHI)                                                    | ccgggatccATGGTGAGCAAGGGCGAGG                                 |                       |                                  |
|                      |                            |                 | mCh-R(EcoRI)                                                    | ccggaattcCTACTTGTACAGCTCGTCCAT                               |                       |                                  |
| 7 RFP-SsrA           | pMV262 (BamHI---EcoRI)     |                 | mCh-F(BamHI)                                                    | ccgggatccATGGTGAGCAAGGGCGAGG                                 |                       |                                  |
|                      |                            |                 | ssrA-R(EcoRI)                                                   | ccggaattcCTACGCGGCCAGTGCGTA                                  |                       |                                  |
| 8 RFP-ClgR(C9)       | pMV262 (BamHI---EcoRI)     |                 | mCh-F(BamHI)                                                    | ccgggatccATGGTGAGCAAGGGCGAGG                                 |                       |                                  |
|                      |                            |                 | mCh-clgR(c9)-R(EcoRI)                                           | ccggaattcTTAGGCCACCGCCAGCGACACCACCGGCGCCTTGTACAGCTCGTCCATACC |                       |                                  |
| 9 RFP-ClgR(C5)       | pMV262 (BamHI---EcoRI)     |                 | mCh-F(BamHI)                                                    | ccgggatccATGGTGAGCAAGGGCGAGG                                 |                       |                                  |
|                      |                            |                 | mCh-clgR(c5)-R(EcoRI)                                           | ccggaattcTTAGGCCACCGCCAGCGACTTGTACAGCTCGTCCATACC             |                       |                                  |
| 10 ClgR-RFP-SsrA     | CgR-RFP (EcoRI---HindIII)  |                 | mCh-F(EcoRI)                                                    | ccggaattcATGGTGAGCAAGGGCGAGG                                 |                       |                                  |
|                      |                            |                 | ssrA-R(HindIII)                                                 | ccgaagcttCTACGCGGCCAGTGCGTA                                  |                       |                                  |
| 11 ClgR-RFP-ClgR(C9) | ClgR-RFP (EcoRI---HindIII) |                 | mCh-F(EcoRI)                                                    | ccggaattcATGGTGAGCAAGGGCGAGG                                 |                       |                                  |
|                      |                            |                 | clgR(c9)-R(HindIII)                                             | ccgaagcttTTAGGCCACCGCCAGCGACA                                |                       |                                  |
| 12 ClgR              | pMV262 (BamHI---HindIII)   |                 | clgR-F(BamHI)                                                   | ccgggatccATGGCGGCTTTGGTGCGTGA                                |                       |                                  |
|                      |                            |                 | clgR-R(HindIII)                                                 | ccgaagcttTTAGGCCACCGCCAGCGAC                                 |                       |                                  |
| 13 ClgR(CΔ29)        | pMV262 (BamHI---HindIII)   |                 | clgR-F(BamHI)                                                   | ccgggatccATGGCGGCTTTGGTGCGTGA                                |                       |                                  |
|                      |                            |                 | clgR(CΔ29)-R(HindIII)                                           | ccgaagcttTTAGCGGGCAAGGCGCTCTTGA                              |                       |                                  |
| 14 ClgR(CΔ9)         | pMV262 (BamHI---HindIII)   |                 | clgR-F(BamHI)                                                   | ccgggatccATGGCGGCTTTGGTGCGTGA                                |                       |                                  |
|                      |                            |                 | clgR(CΔ9)-R(HindIII)                                            | ccgaagcttTAAATGACGACCTTGGTGCTG                               |                       |                                  |
